# Supplementary material
Source: PubMed Central journal article supplement (PMC3325660)
Supplement: 1115982109_pnas.201115982SI.pdf [file 1115982109_pnas.201115982SI.pdf]

# Supporting Information

Ramel et al. 10.1073/pnas.1115982109

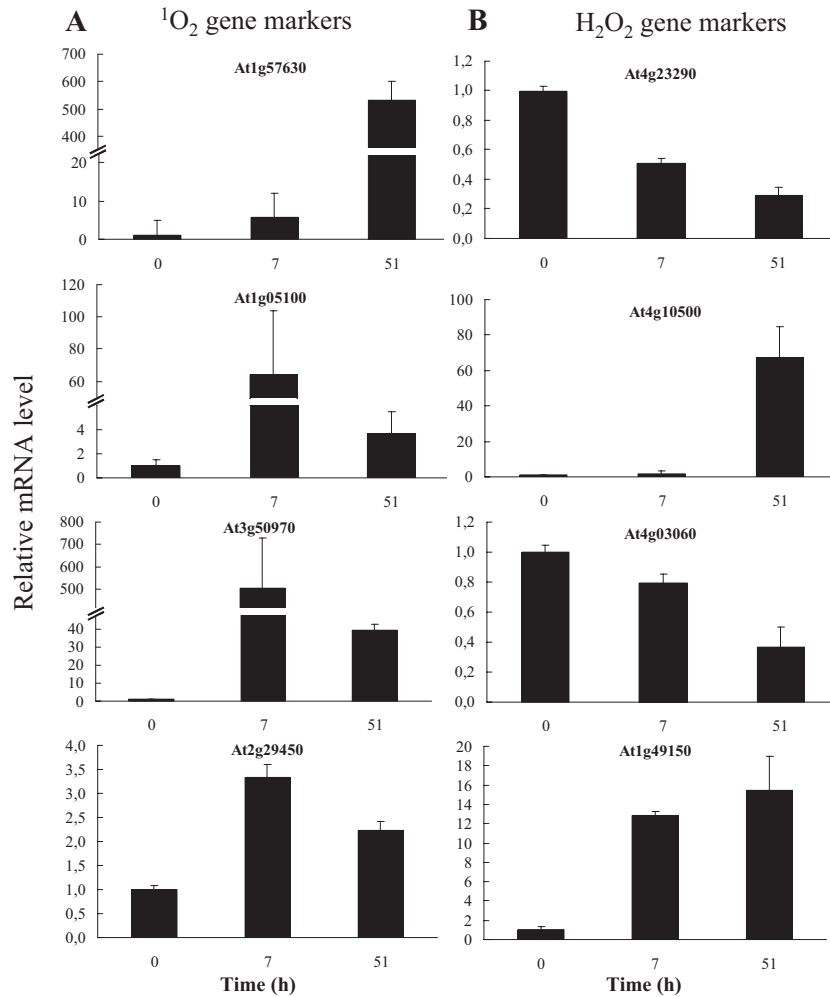

**Fig. S1.** Effects of high light stress on the changes of transcript levels of  $^1\text{O}_2$  and  $\text{H}_2\text{O}_2$  gene markers in *Arabidopsis* leaves. Transcript levels, measured by qRT-PCR of  $^1\text{O}_2$  gene markers [Disease Resistance Protein (At1g57630), Mitogen activated protein kinase kinase kinase 18 (*MAPKKK18*, At1g05100), Toll-Interleukin-Resistance domain-containing protein (At3g50970), and GST 103-1A (*GSTU5*, At2g29450)] (A) and  $\text{H}_2\text{O}_2$  gene markers [Cysteine-rich receptor-like protein kinase 21 (*CRK21*, At4g23290), Oxidoreductase (At4g10500), 2-oxoglutarate-dependent dioxygenase (*OAP2*, At4g03060), and Hypothetical protein (At1g49150)] (B) in *Arabidopsis* leaves. Data are expressed in relative values normalized to the value at time 0. Data are mean values of four to five independent measurements + SD.

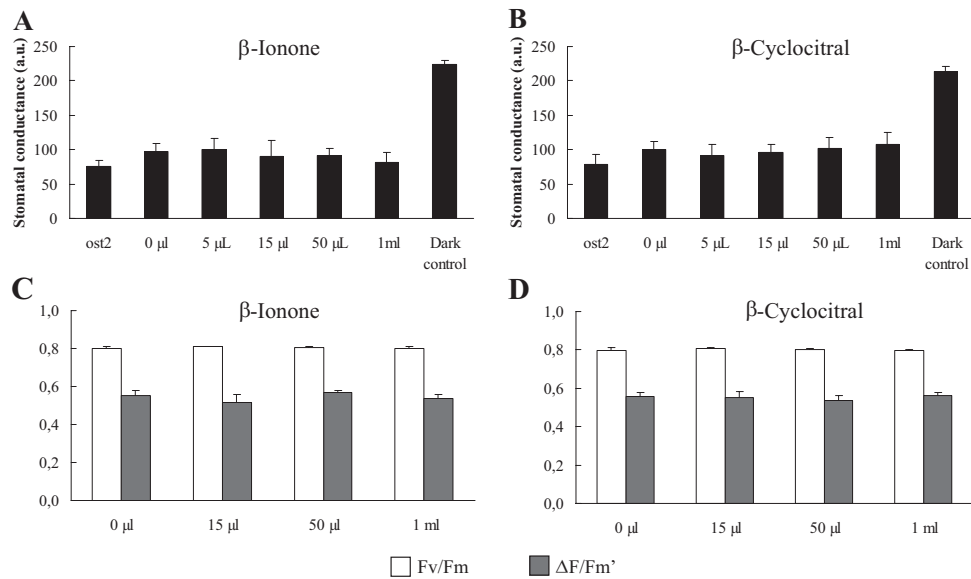

**Fig. S2.** Effects of  $\beta$ -ionone and  $\beta$ -cyclocitral treatments on stomatal conductance and photosynthetic electron transport. (A and B) Relative stomatal aperture in leaves of *Arabidopsis* plants exposed to  $\beta$ -ionone (A) and  $\beta$ -cyclocitral (B). The *Arabidopsis* mutant *ost2* (with stomata always open) and dark-adapted WT *Arabidopsis* plants (with closed stomata) are taken as references (maximal and minimal stomatal conductance, respectively). (C and D) Maximal efficiency of PSII photochemistry measured in the dark by the Fv/Fm chlorophyll fluorescence parameter (white bars) and efficiency of photosynthetic electron transport measured in the light ( $200 \mu\text{mol m}^{-2} \text{s}^{-1}$ ) by the  $\Delta F/Fm'$  chlorophyll fluorescence parameter (gray bars), following exposure to  $\beta$ -ionone (C) and  $\beta$ -cyclocitral (D). Data are mean values of at least 10 measurements + SD.

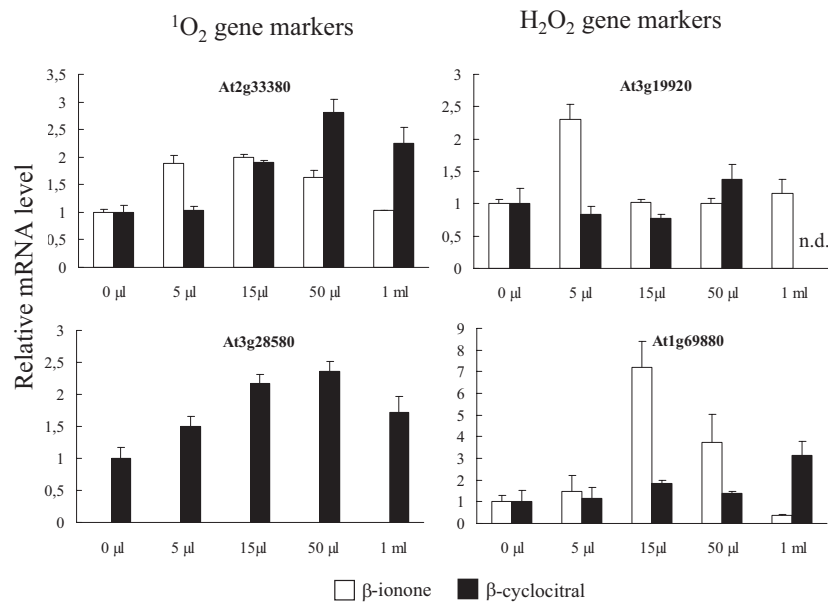

**Fig. S3.** Changes in the transcript levels of  $^1\text{O}_2$  and  $\text{H}_2\text{O}_2$  gene markers in *Arabidopsis* leaves exposed for 4 h to different amounts (0, 5, 15, 50  $\mu\text{L}$ , and 1 mL) of  $\beta$ -ionone (open bars) or  $\beta$ -cyclocitral (filled bars) in an airtight box under a photon flux density of  $60 \mu\text{mol photons m}^{-2} \text{s}^{-1}$ . Transcript levels of two  $^1\text{O}_2$  gene markers [Calcium binding protein (*RD20*, At2g33380) and AAA-type ATPase family protein (At3g28580)] and two  $\text{H}_2\text{O}_2$  gene markers [hypothetical protein (At3g19920), thioredoxin H8 (*TH8*, At1g69880)] were measured. The effect of  $\beta$ -ionone was not tested on At3g28580. Data are expressed in relative values normalized to the value at time 0. Data are mean values of four to five independent measurements + SD. n.d., not determined.



**Table S1. Functional classification of the genes induced by  $\beta$ -cyclocitral**

| Functional category                                           | Category no.                       | Subcategory                                                | Cyclo matches, % | Genome matches, % | P values |          |
|---------------------------------------------------------------|------------------------------------|------------------------------------------------------------|------------------|-------------------|----------|----------|
| Metabolism                                                    | 1                                  |                                                            | 26.6             | 17.3              | 4.85e-05 |          |
|                                                               | 01.05.02                           | Sugar, glucosides, polyols and carboxylate metabolism      | 6.22             | 3                 | 3.02e-03 |          |
|                                                               | 01.05.02.01                        | Nucleotide-sugar metabolism                                | 4.15             | 0.65              | 4.77e-07 |          |
|                                                               | 1.2                                | Secondary metabolism                                       | 7.26             | 1.49              | 3.39e-09 |          |
|                                                               | 01.20.05                           | Metabolism of acetic acid derivatives                      | 1.73             | 0.08              | 3.05e-06 |          |
|                                                               | 01.20.23                           | Metabolism of secondary products derived from L-methionine | 1.03             | 0.09              | 2.54e-03 |          |
|                                                               | 01.20.38                           | Metabolism of toxins/drugs                                 | 2.42             | 0.16              | 5.40e-07 |          |
| Protein with binding function or cofactor requirement         | 16                                 |                                                            | 28               | 24.7              | 1.09e-01 |          |
|                                                               | 16.17                              | Metal binding                                              | 9.34             | 4.56              | 3.64e-04 |          |
|                                                               | 16.25                              | Oxygen binding                                             | 3.80             | 0.82              | 3.18e-05 |          |
| Cellular transport, transport facilities and transport routes | 20                                 |                                                            | 17.9             | 8.51              | 1.99e-07 |          |
|                                                               | 20.01                              | Transported compounds                                      | 15.9             | 6.65              | 3.38e-08 |          |
|                                                               | 20.01.01                           | Ion transport                                              | 4.15             | 1.61              | 2.74e-03 |          |
|                                                               | 20.01.01.01                        | Cation transport                                           | 3.46             | 1.24              | 3.65e-03 |          |
|                                                               | 20.01.01.07.01                     | Nitrate transport                                          | 0.69             | 0.03              | 4.40e-03 |          |
|                                                               | 20.01.15                           | Electron transport                                         | 7.26             | 2.52              | 1.65e-05 |          |
|                                                               | 20.01.27                           | Drug/toxin transport                                       | 1.38             | 0.22              | 4.13e-03 |          |
|                                                               | 20.01.28                           | Hormone transport                                          | 1.03             | 0.04              | 3.49e-04 |          |
|                                                               | 20.03                              | Transport facilities                                       | 4.84             | 2.11              | 3.59e-03 |          |
|                                                               | 20.03.02                           | Carrier-driven transport                                   | 3.80             | 0.58              | 1.16e-06 |          |
|                                                               | 20.03.02.02                        | Symporter                                                  | 1.38             | 0.13              | 6.51e-04 |          |
|                                                               | 20.03.02.03                        | Antiporter                                                 | 2.42             | 0.45              | 3.47e-04 |          |
|                                                               | Cell rescue, defense and virulence | 32                                                         |                  | 15.2              | 5.01     | 5.02e-11 |
|                                                               |                                    | 32.01                                                      | Stress response  | 8.99              | 2.92     | 4.77e-07 |
| 32.01.01                                                      |                                    | Oxidative stress response                                  | 3.46             | 0.70              | 4.18e-05 |          |
| 32.07                                                         |                                    | Detoxication                                               | 4.15             | 0.93              | 2.01e-05 |          |
| 32.07.07                                                      |                                    | Oxygen and radical detoxication                            | 4.15             | 0.91              | 1.67e-05 |          |
| 32.07.07.03                                                   |                                    | Glutathione conjugation reaction                           | 3.11             | 0.20              | 6.04e-09 |          |
| Interaction with the environment                              | 34                                 |                                                            | 14.8             | 5.81              | 1.45e-08 |          |
|                                                               | 34.11                              | Cellular sensing and response to external stimulus         | 14.5             | 5.24              | 2.20e-09 |          |
|                                                               | 34.11.03                           | Chemoperception and response                               | 11.7             | 2.95              | 9.04e-12 |          |
|                                                               | 34.11.03.12                        | Water response                                             | 2.76             | 0.41              | 3.07e-05 |          |
| Systemic Interaction with the environment                     | 36                                 |                                                            | 10               | 2.66              | 1.16e-09 |          |
|                                                               | 36.20                              | Plant fungal specific systemic sensing and response        | 8.30             | 2.43              | 2.11e-07 |          |
|                                                               | 36.20.18                           | Plant hormonal regulation                                  | 7.61             | 2.07              | 1.97e-07 |          |
|                                                               | 36.20.18.05                        | Abscissic acid response                                    | 3.11             | 0.56              | 4.26e-05 |          |
|                                                               | 36.20.18.99                        | Other plant signaling molecules response                   | 4.15             | 0.69              | 9.31e-07 |          |
|                                                               | 36.25                              | Animal specific systemic sensing and response              | 2.42             | 0.37              | 1.15e-04 |          |
|                                                               | 36.25.16                           | Immune response                                            | 2.42             | 0.35              | 7.48e-05 |          |
|                                                               | 36.25.16.08                        | Response to wounding                                       | 2.07             | 0.28              | 1.68e-04 |          |

Functional categories were defined by using MIPS Functional Catalogue ([mips.helmholtz-muenchen.de/proj/funcat/DB](http://mips.helmholtz-muenchen.de/proj/funcat/DB)). Only the data with a P value  $\geq 0.005$  are shown.

**Table S2. Functional classification of the genes repressed by  $\beta$ -cyclocitral**

| Functional category                | Category no. | Subcategory                                        | Cyclo matches, % | Genome matches, % | P values |
|------------------------------------|--------------|----------------------------------------------------|------------------|-------------------|----------|
| Cell rescue, defense and virulence | 32           |                                                    | 13.6             | 5.01              | 1.46e-03 |
|                                    | 32.01        | Stress response                                    | 11.3             | 2.92              | 2.52e-04 |
|                                    | 32.01.06     | Cold shock response                                | 4.54             | 0.58              | 1.75e-03 |
| Interaction with the environment   | 34           |                                                    | 19.3             | 5.81              | 1.08e-05 |
|                                    | 34.11        | Cellular sensing and response to external stimulus | 18.1             | 5.24              | 1.21e-05 |
|                                    | 34.11.03     | Chemoperception and response                       | 10.2             | 2.95              | 1.18e-03 |
|                                    | 34.11.09     | Temperature perception and response                | 5.58             | 0.92              | 1.37e-03 |
| Cell fate                          | 40           |                                                    | 6.81             | 1.58              | 2.77e-03 |
| Development                        | 40.01.03     | Directional cell growth                            | 4.54             | 0.57              | 1.71e-03 |
|                                    | 41           |                                                    | 5.68             | 3.68              | 2.24e-01 |
| Biogenesis of cellular components  | 41.03.08     | Fruit development and ripening                     | 4.54             | 0.63              | 2.45e-03 |
|                                    | 42           |                                                    | 10.2             | 5.46              | 5.11e-02 |
| Subcellular localization           | 42.01        | Cell wall                                          | 9.09             | 0.92              | 1.64e-06 |
|                                    | 70           |                                                    | 40.9             | 37                | 2.60e-01 |
|                                    | 70.01        | Cell wall                                          | 11.3             | 1.51              | 9.14e-07 |

Functional categories were defined by using MIPS Functional Catalogue ([mips.helmholtz-muenchen.de/proj/funcat/DB](http://mips.helmholtz-muenchen.de/proj/funcat/DB)). Only the data with a P value  $\geq 0.005$  are shown.

**Table S3. Transcript levels of  $^1\text{O}_2$  specific genes identified by Gadjev et al. (1) induced by  $\beta$ -cyclocitral**

| Probe set | Locus identifier | Fold change          |            | Description                                                                                          |
|-----------|------------------|----------------------|------------|------------------------------------------------------------------------------------------------------|
|           |                  | $\beta$ -Cyclocitral | <i>flu</i> |                                                                                                      |
| 265194_at | At1g05010        | 2.21                 | 5.248      | EFE (ethylene forming enzyme)                                                                        |
| 262803_at | At1g21000        | 2.21                 | 5.807      | Unknown protein                                                                                      |
| 255967_at | At1g22280        | 1.56                 | 5.064      | Protein phosphatase 2C, putative/PP2C, putative                                                      |
| 245768_at | At1g33590        | 2.07                 | 6.818      | Disease resistance protein-related/LRR protein-related                                               |
| 259548_at | At1g35260        | 1.51                 | 5.091      | Bet v I allergen family protein                                                                      |
| 256297_at | At1g69500        | 3.41                 | 9.382      | Oxygen binding                                                                                       |
| 266259_at | At2g27830        | 1.89                 | 6.620      | Unknown protein                                                                                      |
| 266299_at | At2g29450        | 3.78                 | 7.468      | ATGSTU5 ( <i>Arabidopsis thaliana</i> GST (class tau) 5); glutathione transferase                    |
| 263904_at | At2g36380        | 3.10                 | 7.589      | ATPDR6/PDR6 (PLEIOTROPIC DRUG RESISTANCE 6); ATPase, coupled to transmembrane movement of substances |
| 256999_at | At3g14200        | 2.17                 | 8.607      | DNAJ heat shock N-terminal domain-containing protein                                                 |
| 252474_at | At3g46620        | 2.70                 | 7.820      | Zinc finger (C3HC4-type RING finger) family protein                                                  |
| 252102_at | At3g50970        | 4.00                 | 17.689     | LT130/XERO2 (LOW TEMPERATURE-INDUCED 30)                                                             |
| 246289_at | At3g56880        | 2.07                 | 5.831      | VQ motif-containing protein                                                                          |
| 253859_at | At4g27657        | 3.46                 | 5.102      | Unknown protein                                                                                      |
| 246270_at | At4g36500        | 1.62                 | 21.796     | Unknown protein                                                                                      |
| 245885_at | At5g09440        | 2.98                 | 5.522      | Phosphate-responsive protein, putative                                                               |
| 250449_at | At5g10830        | 3.00                 | 17.019     | Embryo-abundant protein-related                                                                      |
| 246463_at | At5g16970        | 6.97                 | 11.142     | AT-AER (ALKENAL REDUCTASE); 2-alkenal reductase                                                      |
| 246870_at | At5g26030        | 1.51                 | 8.635      | Ferrochelatase                                                                                       |
| 249208_at | At5g42650        | 1.72                 | 11.540     | AOS (ALLENE OXIDE SYNTHASE); hydro-lyase/ oxygen binding                                             |
| 248232_at | At5g53760        | 1.63                 | 6.557      | MLO11 (MILDEW RESISTANCE LOCUS O 11); calmodulin binding                                             |
| 247193_at | At5g65380        | 2.56                 | 5.295      | Ripening-responsive protein, putative                                                                |

1. Gadjev I, et al. (2006) Transcriptomic footprints disclose specificity of reactive oxygen species signaling in *Arabidopsis*. *Plant Physiol* 141:436–445.
